# Supplementary material for: Electronic effects in the dissociative ionisation of pyrene clusters
Source: Royal Society of Chemistry journal article supplement (doi:10.1039/d2cp05679h), 2023-01-01
Supplement: d2cp05679h1.pdf [file d2cp05679h1.pdf]

## Electronic effects in the dissociative ionisation of pyrene clusters

Gustavo A. Garcia<sup>a</sup>, Léo Dontot<sup>b,c</sup>, Mathias Rapacioli<sup>c</sup>, Fernand Spiegelman<sup>c</sup>, Philippe Bréchnignac<sup>d</sup>, Laurent Nahon<sup>a</sup> and Christine Joblin<sup>b</sup>

<sup>a</sup>Synchrotron SOLEIL, L'Orme des Merisiers, Départementale 128, 91190 Saint Aubin, France

<sup>b</sup>Institut de Recherche en Astrophysique et Planétologie, Université de Toulouse III – Paul Sabatier, CNRS, CNES, 9 avenue du Colonel Roche, BP 44346, F-31028 Toulouse, France

<sup>c</sup>Laboratoire de Chimie et Physique Quantiques, FERMI, Université de Toulouse III – Paul Sabatier, CNRS, 118 Route de Narbonne, F-31062 Toulouse, France

<sup>d</sup>Institut des Sciences Moléculaires d'Orsay, CNRS, Université Paris-Saclay, F-91405 Orsay, France

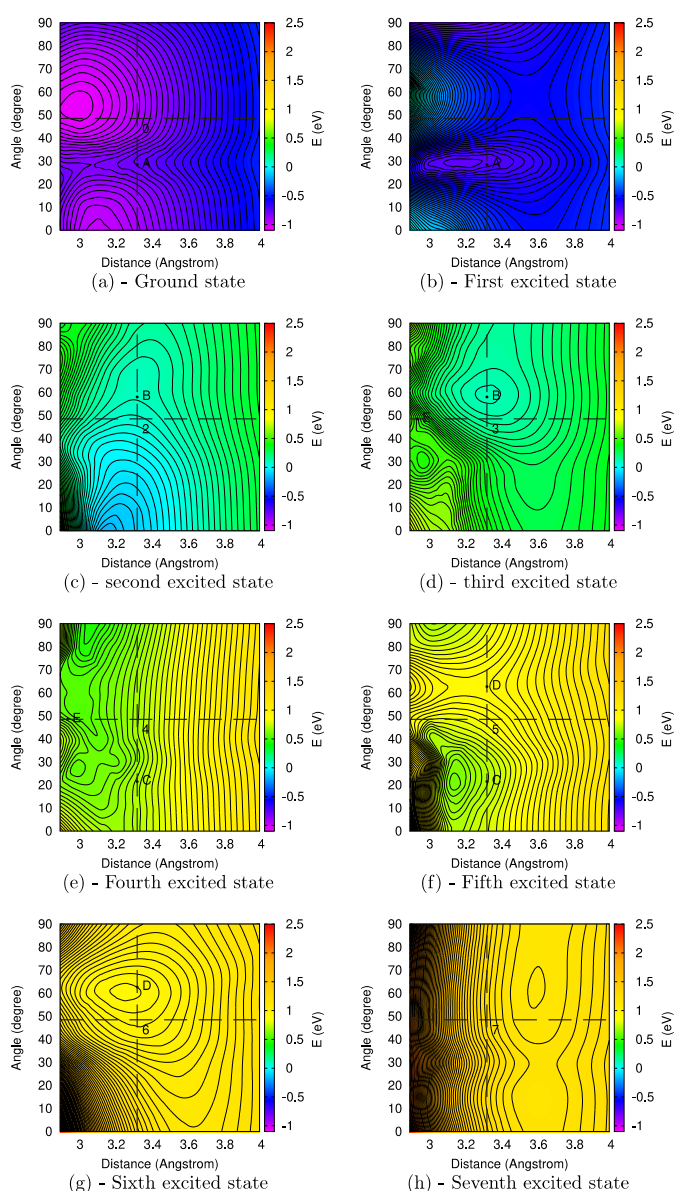

**Figure S1:** Two-dimensional potential energy surfaces for the ground and first seven electronically excited states of cationic pyrene dimer. The zero of the energy colour scale corresponds to the first dissociation limit  $M_2^+ \rightarrow M^+ + M$ , with both cationic and neutral monomers in their ground states. The points labelled by numbers and letters are the same as those in the Figure 7 of the main article.
